# Supplementary material for: Pheophorbide a Derivatives Exert Antiwrinkle Effects on UVB-Induced Skin Aging in Human Fibroblasts
Source: MDPI journal article supplement (doi:10.3390/life11020147), 2021-02-15
Supplement: s1 [file s1]

## Supplementary File

# Pheophorbide a Derivatives Exert Anti-wrinkle Effects on UVB-induced Skin Aging in Human Fibroblasts

Hwa Lee <sup>†</sup>, Ho-Yong Park <sup>\*</sup>, and Tae-Sook Jeong <sup>\*</sup>

Industrial Bio-materials Research Center, Korea Research Institute of Bioscience and Biotechnology, Daejeon 34141, Republic of Korea; leehua@kribb.re.kr (H.L.); hypark@kribb.re.kr (H.-Y.P.); tsjeong@kribb.re.kr (T.-S.J)

<sup>†</sup> Earlier known as Hua Li

<sup>\*</sup> Correspondence: tsjeong@kribb.re.kr (T.-S.J.); hypark@kribb.re.kr (H.-Y.P.); Tel.: +82-42-860-4558 (T.-S.J.); +82-42-860-4650 (H.-Y.P.)

Treatments with 5  $\mu$ M of PA, PyroPA, and PyroPA-ME were strongly decreased UVB-induced *MMP-1* expression levels, with no difference among three pheophorbides.

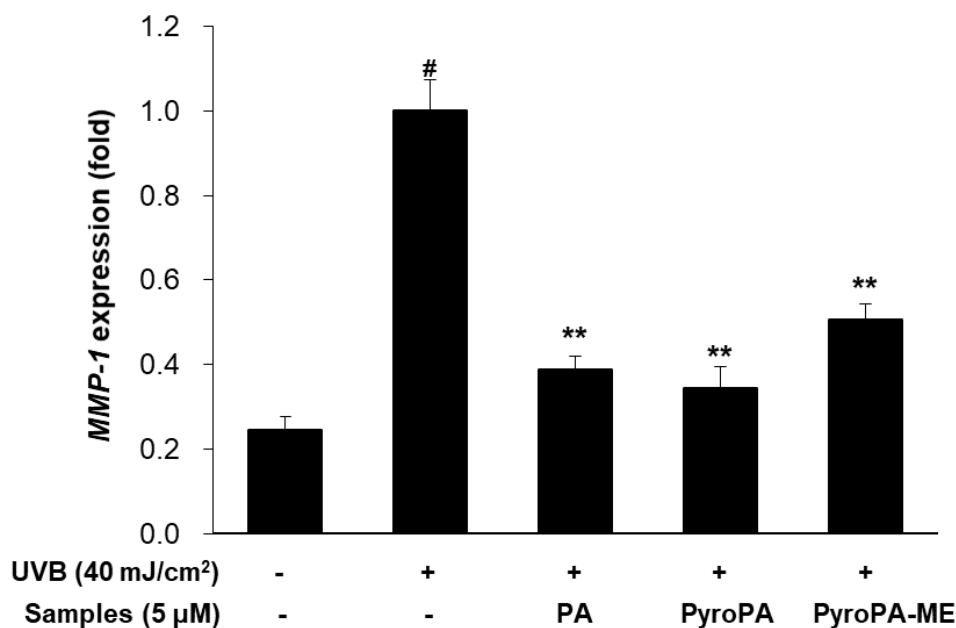

Figure S1. Effects of the three pheophorbides on the expression of *MMP-1* mRNA in UVB-exposed CCD-986sk cells. Cells were treated with 5  $\mu$ M pheophorbides and exposed to UVB (40 mJ/cm<sup>2</sup>). The mRNA levels of *MMP-1* were measured by real-time qRT-PCR and normalized using *ACTIN* as a reference gene. Values are presented as the mean  $\pm$  SD (n = 3). #*p* < 0.01 vs. cells treated with media only; \*\**p* < 0.01 vs. cells treated with UVB only.
